# Supplementary material for: Use of sterically-stabilised polystyrene latex particles as a pH-responsive particulate emulsifier to prepare surfactant-free oil-in-water emulsionsElectronic supplementary information (ESI) available: SEM and NMR spectrum of the polystyrene latex particles. See http://www.rsc.org/suppdata/cc/b3/b304967a/
Source: Royal Society of Chemistry journal article supplement (doi:10.1039/b304967a), 2003-01-01
Supplement: b304967a.doc [file b304967a.doc]

**Electronic Supplementary Information**

Scanning electron micrograph of the dried polystyrene latex particles prepared using the DMA-MMA diblock copolymer stabiliser. The particles are spherical and have a reasonably uniform size distribution (Scale bar = 300 nm).


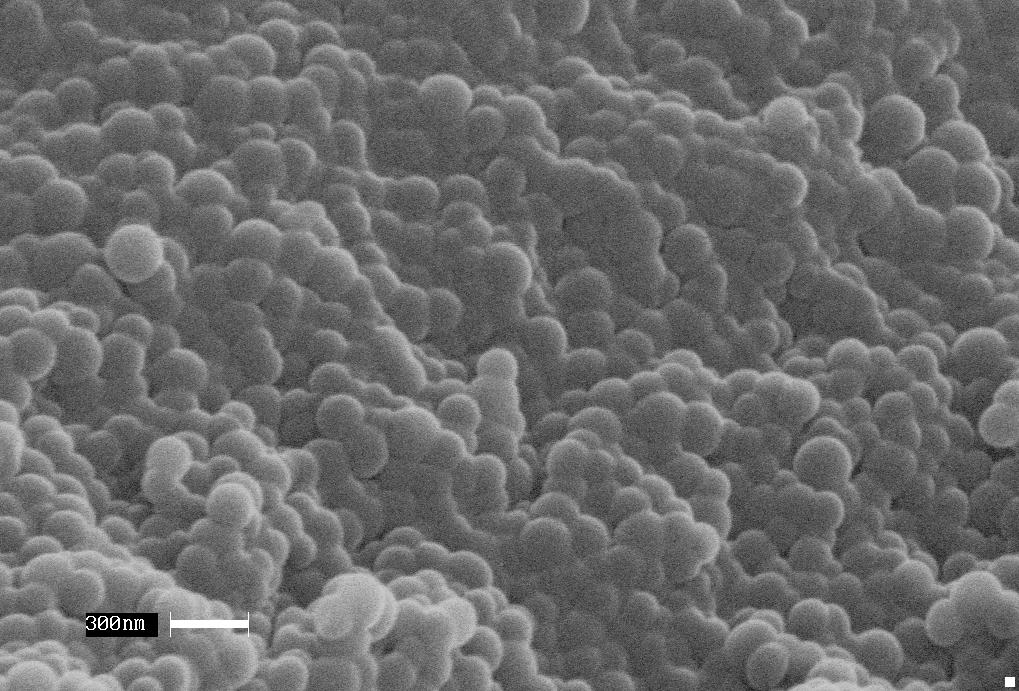


1H NMR spectrum of the polystyrene latex dissolved in CDCl3. The signals due to the DMA-MMA diblock copolymer stabiliser are assigned. The stabiliser content of this latex was approximately 8 % by mass.
